# Supplementary material
Source: PubMed Central journal article supplement (PMC4001121)
Supplement: NIHMS557919-supplement-1.pdf [file NIHMS557919-supplement-1.pdf]

**Supplementary Table S1. Taqman Assays**

| <b>Symbol</b> | <b>Gene Name</b>                                 | <b>Assay ID <sup>a</sup></b> | <b>Amplicon Size (bp)</b> |
|---------------|--------------------------------------------------|------------------------------|---------------------------|
| <i>ERBB2</i>  | human epidermal growth factor receptor 2 (HER-2) | Hs01001580_m1                | 60                        |
| <i>ESR1</i>   | estrogen receptor 1                              | Hs00174860_m1                | 62                        |
| <i>HMBS</i>   | hydroxymethylbilane synthase                     | Hs00609297_m1                | 64                        |
| <i>IPO8</i>   | importin 8                                       | Hs00914053_m1                | 67                        |
| <i>JAK2</i>   | janus kinase 2, exon 8-9                         | Hs01078136_m1                | 84                        |
| <i>JAK2</i>   | janus kinase 2, exon 23-24                       | Hs00234567_m1                | 101                       |
| <i>PGR</i>    | progesterone receptor                            | Hs01556702_m1                | 77                        |
| <i>RPLP0</i>  | ribosomal protein, large, P0                     | Hs99999902_m1                | 105                       |
| <i>TFRC</i>   | transferrin receptor (p90, CD71)                 | Hs99999911_m1                | 105                       |

<sup>a</sup> Applied Biosystems

**Supplementary Table S2. Characteristics of Patients by Recurrence Status**

| <b>Variable*</b>                  | <b>Value</b>                                      | <b>No Recurrence</b> | <b>Recurrence</b> | <b>P-Value</b> |
|-----------------------------------|---------------------------------------------------|----------------------|-------------------|----------------|
| Recurrence                        | #                                                 | 112                  | 112               |                |
| Age at Diagnosis                  | Mean(sd)                                          | 51(11)               | 50(12)            | 0.47           |
| Year Collected                    | Mean(sd)                                          | 1998(5)              | 1997(5)           | 0.06           |
| Age > 50                          | Yes                                               | 56 (50.0%)           | 51 (45.5%)        | 0.59           |
| Ever Pregnant                     | No                                                | 24 (21.4%)           | 25 (22.3%)        |                |
|                                   | Unknown                                           | 0 (0.0%)             | 2 (1.8%)          |                |
|                                   | Yes                                               | 88 (78.6%)           | 85 (75.9%)        | 0.53           |
| Age at First Pregnancy            | Mean(sd)                                          | 26(6)                | 27(6)             | 0.61           |
| Pregnant at Diagnosis             | Yes                                               | 0 (0.0%)             | 2 (1.8%)          | 0.50           |
| Ductal Carcinoma In Situ          | Yes                                               | 88 (78.6%)           | 94 (83.9%)        | 0.39           |
| Lobular Carcinoma In Situ         | Yes                                               | 17 (15.2%)           | 10 (8.9%)         | 0.22           |
| <b>Extra Nodal Extensions</b>     | Yes                                               | 33 (29.5%)           | 41 (36.6%)        | 0.32           |
| Multifocal                        | Yes                                               | 25 (22.3%)           | 27 (24.1%)        | 0.87           |
| Histologic Grade                  | Grade 1                                           | 5 (4.5%)             | 0 (0.0%)          |                |
|                                   | Grade 2                                           | 19 (17.0%)           | 21 (18.8%)        |                |
|                                   | Grade 3                                           | 84 (75.0%)           | 83 (74.1%)        |                |
|                                   | Unknown                                           | 4 (3.6%)             | 8 (7.1%)          | 0.09           |
| Nuclear Grade                     | High                                              | 70 (62.5%)           | 76 (67.9%)        |                |
|                                   | Intermediate                                      | 37 (33.0%)           | 28 (25.0%)        |                |
|                                   | Low                                               | 3 (2.7%)             | 6 (5.4%)          |                |
|                                   | Unknown                                           | 2 (1.8%)             | 2 (1.8%)          | 0.45           |
| <b>Lymphovascular Invasion</b>    | No/Unknown                                        | 56 (50.0%)           | 52 (46.4%)        |                |
|                                   | Suspicious                                        | 11 (9.8%)            | 7 (6.2%)          |                |
|                                   | Yes                                               | 45 (40.2%)           | 53 (47.3%)        | 0.45           |
| <b>Tumor Size</b>                 | < 2cm                                             | 33 (29.5%)           | 39 (35.1%)        |                |
|                                   | 2 - 5 cm                                          | 62 (55.4%)           | 59 (53.2%)        |                |
|                                   | > 5 cm                                            | 17 (15.2%)           | 13 (11.7%)        | 0.59           |
| # of Lymph Nodes Examined         | Mean(sd)                                          | 17(8)                | 18(10)            | 0.56           |
| <b># of Positive Lymph Nodes</b>  | 0                                                 | 19 (17.0%)           | 20 (17.9%)        |                |
|                                   | 1 to 3                                            | 61 (54.5%)           | 45 (40.2%)        |                |
|                                   | 4 to 9                                            | 20 (17.9%)           | 31 (27.7%)        |                |
|                                   | 10+                                               | 12 (10.7%)           | 16 (14.3%)        | 0.15           |
| Histology                         | Ductal                                            | 92 (82.1%)           | 94 (83.9%)        |                |
|                                   | Lobular                                           | 10 (8.9%)            | 8 (7.1%)          |                |
|                                   | Lobular/Ductal Mixed                              | 9 (8.0%)             | 7 (6.2%)          |                |
|                                   | Metaplastic Carcinoma,<br>Not otherwise specified | 1 (0.9%)             | 3 (2.7%)          | 0.71           |
| <b>Estrogen Receptor (ER)</b>     | Negative                                          | 24 (21.4%)           | 34 (30.4%)        |                |
|                                   | Positive                                          | 88 (78.6%)           | 75 (67.0%)        |                |
|                                   | Unknown                                           | 0 (0.0%)             | 3 (2.7%)          | 0.05           |
| <b>Progesterone Receptor (PR)</b> | Negative                                          | 43 (38.4%)           | 44 (39.3%)        |                |
|                                   | Positive                                          | 69 (61.6%)           | 65 (58.0%)        |                |
|                                   | Unknown                                           | 0 (0.0%)             | 3 (2.7%)          | 0.29           |
| Hormone Receptor (=ER or PR)      | Negative                                          | 23 (20.5%)           | 29 (25.9%)        |                |
|                                   | Positive                                          | 89 (79.5%)           | 80 (71.4%)        |                |
|                                   | Unknown                                           | 0 (0.0%)             | 3 (2.7%)          | 0.15           |
| <b>HER2</b>                       | Negative                                          | 56 (50.0%)           | 51 (45.5%)        |                |
|                                   | Positive                                          | 11 (9.8%)            | 22 (19.6%)        |                |
|                                   | Unknown                                           | 45 (40.2%)           | 39 (34.8%)        | 0.12           |
| Triple Negative                   | No                                                | 90 (80.4%)           | 87 (77.7%)        |                |
|                                   | Unknown                                           | 10 (8.9%)            | 14 (12.5%)        |                |
|                                   | Yes                                               | 12 (10.7%)           | 11 (9.8%)         | 0.70           |
| Tamoxifen Given                   | Yes                                               | 63 (56.2%)           | 60 (53.6%)        | 0.79           |
| Herceptin Given                   | Yes                                               | 3 (2.7%)             | 5 (4.5%)          | 0.72           |
| Hormone Therapy                   | Yes                                               | 81 (72.3%)           | 71 (63.4%)        | 0.20           |
| Surgery Type                      | Partial Mastectomy                                | 39 (34.8%)           | 40 (35.7%)        |                |
|                                   | Total Mastectomy                                  | 73 (65.2%)           | 72 (64.3%)        | 1.00           |
| Surgical Margins Positive         | Yes                                               | 6 (5.4%)             | 4 (3.6%)          | 0.75           |
| Surgical Margins Close/Positive   | Yes                                               | 35 (31.2%)           | 33 (29.5%)        | 0.88           |
| Radiation Therapy                 | Yes                                               | 78 (69.6%)           | 68 (60.7%)        | 0.21           |

\*Variables used in matching are bold

**Supplementary Table S3. Case-Control Study of *JAK2* mRNA Levels and Distant Breast Cancer Recurrence**

| <b>Continuous Model, All Tissues <sup>a</sup></b>               |              | <b><i>JAK2-ex23/24</i></b> | <b><i>JAK2-ex8/9</i></b> |
|-----------------------------------------------------------------|--------------|----------------------------|--------------------------|
|                                                                 | n            | 223                        | 223                      |
| Un-adjusted Regression                                          | Coefficient  | -0.4165                    | -0.3712                  |
|                                                                 | P-Value      | 0.0004                     | 0.0007                   |
| Adjusted Regression                                             | Coefficient  | -0.3725                    | -0.3358                  |
|                                                                 | P-Value      | 0.0032                     | 0.0056                   |
| <b>Continuous Model, Primary Tissues Only <sup>b</sup></b>      |              |                            |                          |
|                                                                 | n            | 192                        | 192                      |
| Un-adjusted Regression                                          | Coefficient  | -0.53322                   | -0.50955                 |
|                                                                 | P-Value      | 0.00007                    | 0.00006                  |
| Adjusted Regression                                             | Coefficient  | -0.44692                   | -0.44983                 |
|                                                                 | P-Value      | 0.00183                    | 0.00175                  |
| <b>Dichotomous Median Split Model, All Tissues <sup>c</sup></b> |              |                            |                          |
|                                                                 | n            | 223                        | 223                      |
| Un-adjusted Regression                                          | Coefficient  | -0.744                     | -0.596                   |
|                                                                 | P-Value      | 0.006                      | 0.028                    |
| Recurrence Rates                                                | Above Median | 45 (40.5%)                 | 47 (42.3%)               |
|                                                                 | Below Median | 66 (58.9%)                 | 64 (57.1%)               |
| Adjusted Regression                                             | Coefficient  | -0.653                     | -0.493                   |
|                                                                 | P-Value      | 0.022                      | 0.097                    |

<sup>a</sup>Coefficients and p-values were obtained using logistic regression with transcript expression as a predictor of recurrence. Coefficients estimate the change in the log of the odds that an individual experienced a recurrence for every two-fold increase in transcript expression. A negative coefficient indicates that increased transcript expression is associated with decreased likelihood of recurrence.

<sup>b</sup>Coefficients and p-values were calculated as in (a) using only primary tissue. For individuals with both a primary and node specimen, only the primary tissue was included (n=26). Data from individuals with only a node specimen were excluded (n=31).

<sup>c</sup>Coefficients and p-values were obtained using logistic regression with above-median versus below-median transcript expression as a predictor of recurrence. Values for individuals with multiple specimens were averaged to one value per individual.

**Supplementary Table S4. JAK2 mRNA vs Protein Levels in Primary Breast Tumors**

|        |               | IHC         |           |      |           |      |           |      |                              |
|--------|---------------|-------------|-----------|------|-----------|------|-----------|------|------------------------------|
|        |               | AUTOMATED   | MANUAL    |      |           |      |           |      |                              |
|        |               | TOTAL       | INVASIVE  |      | INSITU    |      | NORMAL    |      | COMMENTS                     |
| Sample | JAK2 mRNA, RQ | JAK2 ratio* | Intensity | %    | Intensity | %    | Intensity | %    |                              |
| 066N   | 15.5          | 0.0026      | 0         | 100% |           |      | +2        | < 1% |                              |
| 066R   | 12.7          | 0.0033      | 0         | 100% |           |      | +1        | 1%   |                              |
| 066U   | 9.9           | 0.0031      |           |      | 0         | 100% | 0         | 100% |                              |
| 066S   | 9.0           | 0.0003      | +1        | 1%   | 0         | 100% | 0         | 100% |                              |
| 066V   | 7.9           | 0.0011      | 0         | 100% | 0         | 100% | +1        | 1%   |                              |
| 066H   | 6.9           | 0.0038      | 0         | 100% | +1        | 2%   | +1        | 2%   |                              |
| 066P   | 6.7           | 0.0066      | 0         | 100% |           |      | 0         | 100% | areas of positive fibrocytes |
| 066Q   | 6.5           | 0.1182      | +3        | 70%  | +1        | 60%  | +1        | 10%  |                              |
| 066W   | 6.4           | 0.0002      | 0         | 100% | 0         | 100% | 0         | 100% |                              |
| 066D   | 6.3           | 0.0491      | +2        | 20%  |           |      |           |      |                              |
| 066F   | 1.7           | 0.0077      | +2        | 10%  | 0         | 100% | 0         | 100% |                              |
| 066L   | 1.6           | 0.0489      | +3        | 90%  |           |      | +1        | 20%  |                              |
| 066B   | 1.4           | 0.0104      | +2        | 20%  |           |      | +1        | 1%   |                              |
| 066M   | 1.4           | 0.0002      | 0         | 100% | 0         | 100% | 0         | 100% |                              |
| 066E   | 1.3           | 0.0108      | +2        | 20%  |           |      |           |      |                              |
| 066I   | 0.9           | 0.0882      | +3        | 80%  |           |      | +1        | 1%   |                              |
| 066J   | 0.8           | 0.0257      | +2        | 40%  |           |      |           |      |                              |
| 066G   | 0.4           | 0.0129      | +2        | 10%  | 0         | 100% |           |      |                              |
| 066K   | 0.3           | 0.0086      |           |      |           |      | +2        | 20%  | fibroadoma/phyllodes         |
| 066T   | 0.2           | 0.0024      | +1        | 2%   |           |      | 0         | 100% |                              |

Correlation JAK2 mRNA vs JAK2 IHC ratio=-0.17

Blank cells = tissue component not present

\* ratio of JAK2 staining area relative to total tissue area
