# Supplementary material
Source: PubMed Central journal article supplement (PMC4001121)
Supplement: NIHMS557919-supplement-2.pdf [file NIHMS557919-supplement-2.pdf]

## Supplementary Figure Legends

**Supplementary Figure S1. *JAK2* mRNA quantification in primary breast tumors.** A) Transcripts for *JAK2* (exon23/24 probe), and the breast cancer genes *ESR1*, *ERBB2*, and *PGR* were measured by quantitative RT-PCR using RNA samples extracted from formalin-fixed, paraffin-embedded breast cancer samples. Values are shown normalized to the endogenous control gene *HMBS*, and samples are arranged on the x-axis in order of increasing RNA abundance / integrity as measured by *HMBS* Ct values. Values greater than six standard deviations from the mean (asterisk) are not to scale. B) Correlation between intra-transcript measurements using Taqman probes for the indicated exon junctions for *JAK2*. C) Transcript levels of *JAK2* (exon23/24 probe), and the breast cancer genes *ESR1*, *ERBB2*, and *PGR* are shown in 14 breast cancer cases in which three separate FFPE tumor samples were available. D) Transcript levels of the breast cancer genes *ESR1*, *ERBB2*, and *PGR* are shown relative to their respective clinical hormone receptor status. U, unavailable.

**Supplementary Figure S2. Evaluating *JAK2* mRNA and protein levels in human breast cancer cell lines.** A) *JAK2* protein levels were determined by western blotting in each of the indicated human breast cancer cell lines. The ratio of *JAK2* to TUBULIN (loading control) is indicated above each lane. Relative *JAK2* mRNA levels in each cell line were determined by quantitative RT-PCR and are shown normalized to the control genes *RPLP0*, *IPO8*, and *TFRC*. B) *JAK2* mRNA and protein levels are plotted for each cell line. The correlation coefficient ( $r$ ), is shown above the graph.

**Supplementary Figure S3. Validating the specificity of a total *JAK2* antibody for immunohistochemistry.** The specificity of a total *JAK2* antibody (clone D2E12, Cell Signaling Technology) for immunohistochemistry was validated using *JAK2*-deficient  $\gamma$ 2A cells versus  $\gamma$ 2A cells transiently-transfected with a human *JAK2* cDNA.

**Supplementary Figure S4. Ruxolitinib inhibits the anti-CD3-dependent production of IFN- $\gamma$ .** Murine splenocytes were stimulated with anti-CD3 in the presence of the indicated concentrations of ruxolitinib or a vehicle control (DMSO). IFN- $\gamma$  levels in culture supernatants were measured by ELISA. Errors bars are the standard deviation of triplicate ELISA determinations.
