# Supplementary material
Source: PubMed Central journal article supplement (PMC4001121)

Supplementary Fig. S1

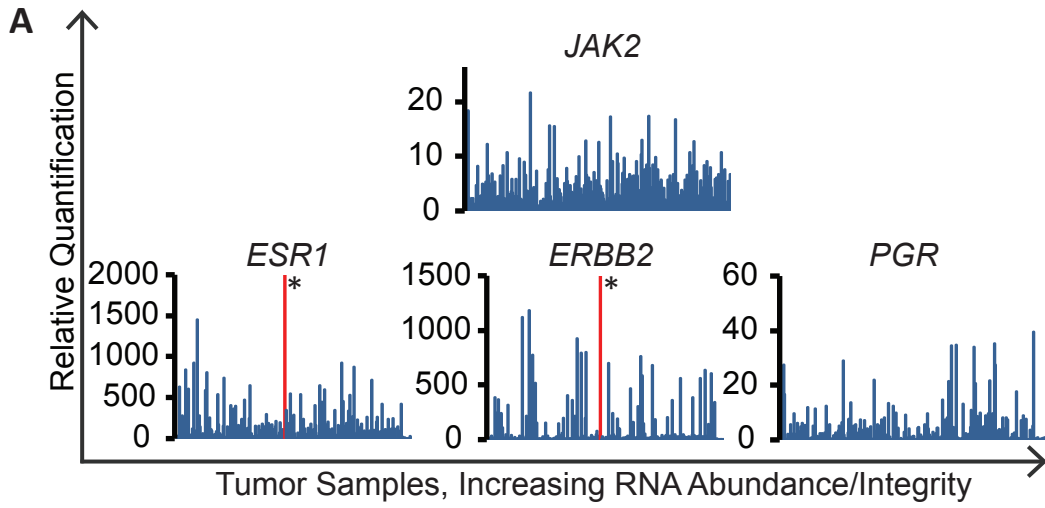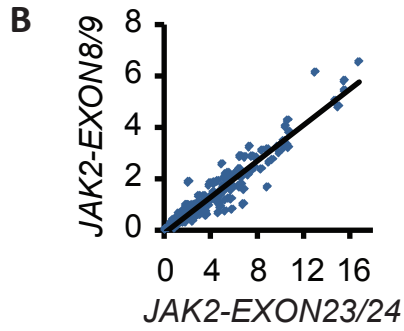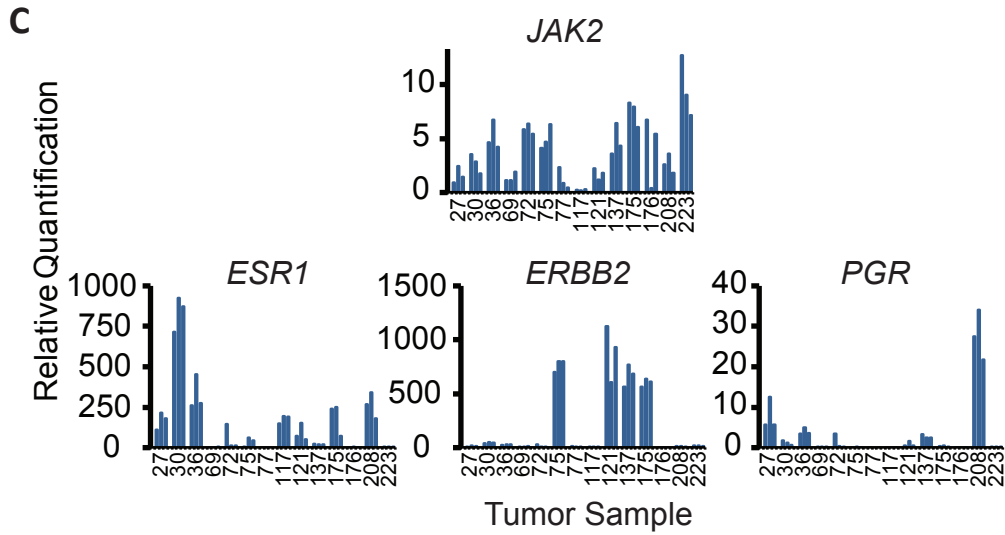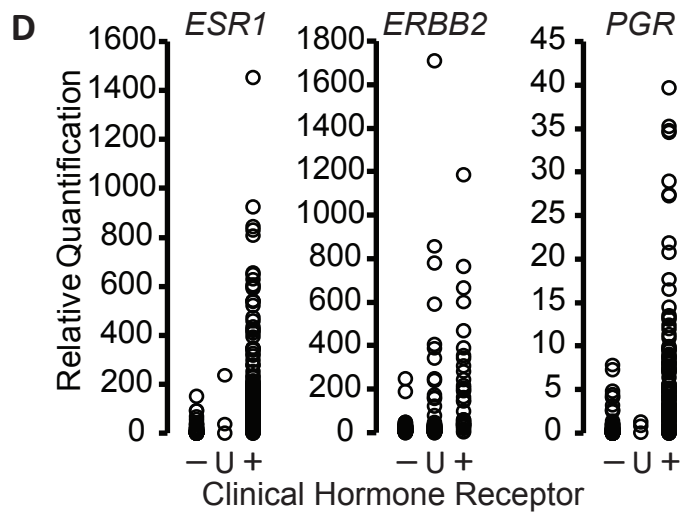

# Supplementary Fig. S2

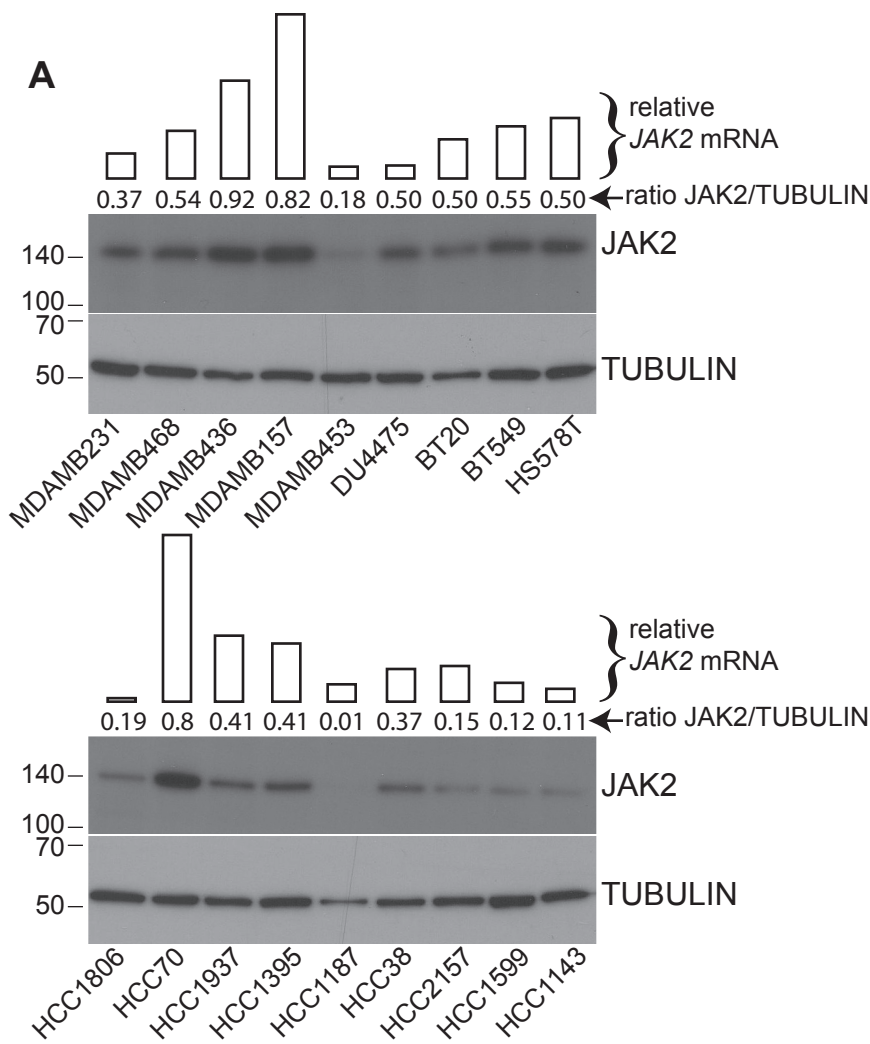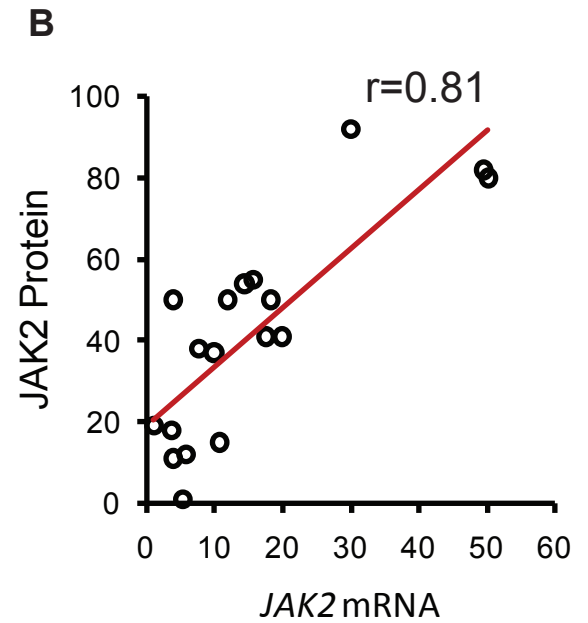

Supplementary Fig. S3

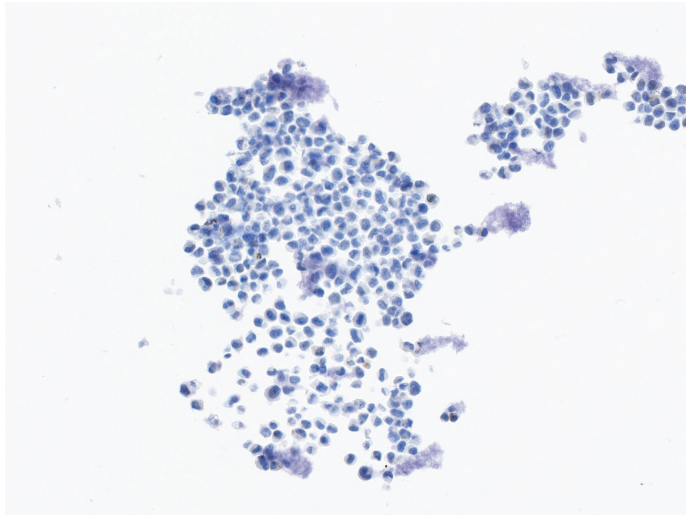

$\gamma$ 2A cells,  
JAK2 IHC

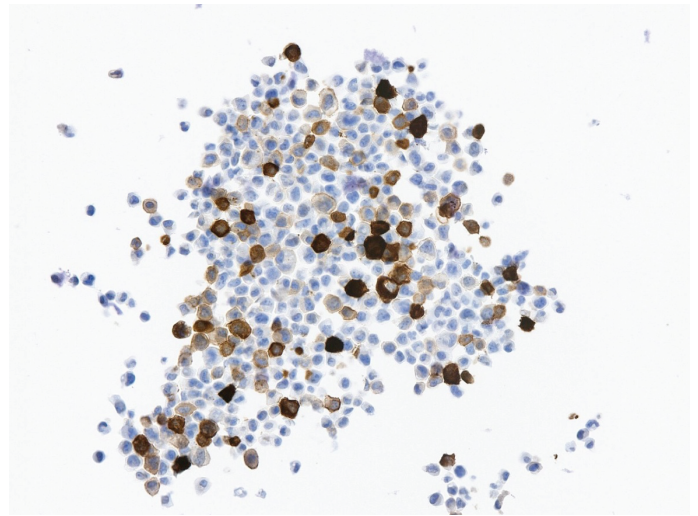

$\gamma$ 2A cells + JAK2 cDNA,  
JAK2 IHC

Supplementary Fig. S4

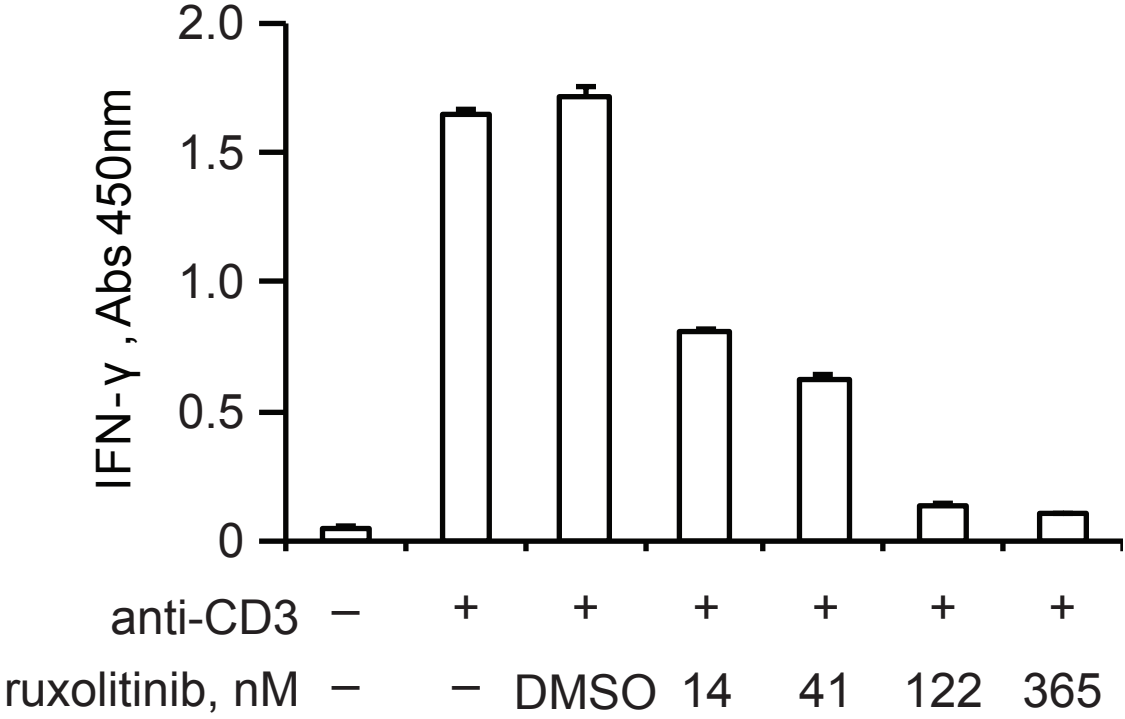

Supplement: NIHMS557919-supplement-3.pdf [file NIHMS557919-supplement-3.pdf]
